# Supplementary material for: Sec-mediated secretion by Coxiella burnetii
Source: PubMed Central journal article supplement (PMC3882888; doi:10.1186/1471-2180-13-222), 2013-10-05

Additional file 5

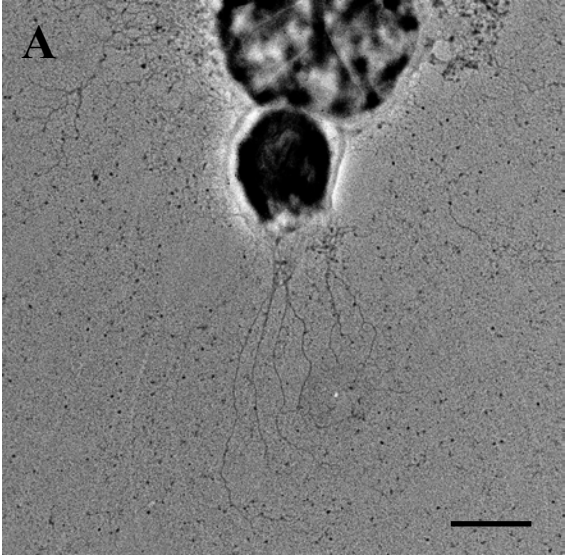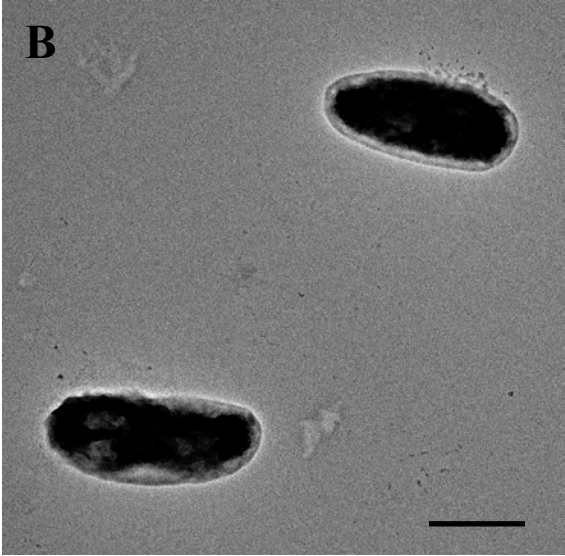

Supplement: 1471-2180-13-222-S5.pdf [file 1471-2180-13-222-S5.pdf]
